# Supplementary material
Source: Royal Society of Chemistry journal article supplement (doi:10.1039/d6tb00552g)
Supplement: d6tb00552g1.pdf [file d6tb00552g1.pdf]

## Supporting Information

### Supplementary materials

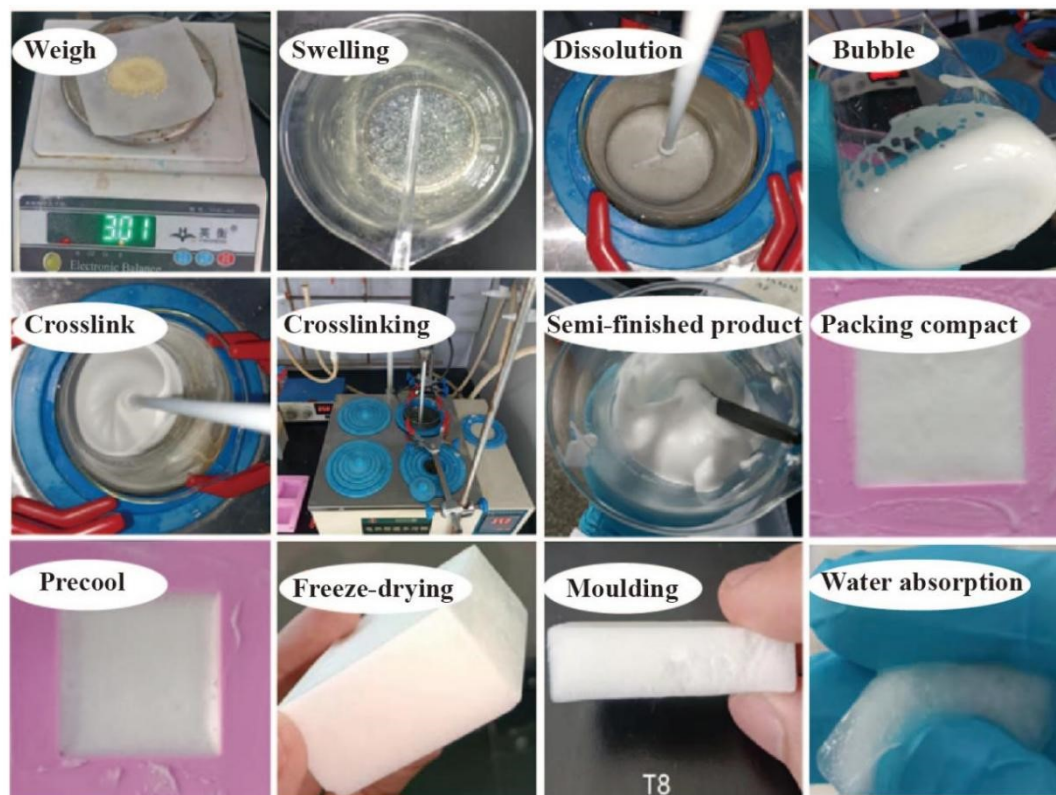

**Supplementary Figure 1.** The process of preparing gelatin.

**Supplementary Table.1** Summary table of AGS formulationscreening

results and selected optimal scaffold properties.

| Factors Level | A Concentration of gelatin sponge(%) | B Formaldehyde concentration(%) | C Crosslinking temperature(°C) | Multiple of water absorption |
|---------------|--------------------------------------|---------------------------------|--------------------------------|------------------------------|
| 1             | 3.5                                  | 1                               | 30                             | 25                           |
| 2             | 3.5                                  | 2                               | 35                             | 30                           |
| 3             | 3.5                                  | 4                               | 40                             | 57                           |
| 4             | 3.5                                  | 6                               | 45                             | 41                           |
| 5             | 5                                    | 1                               | 35                             | 51                           |
| 6             | 5                                    | 2                               | 30                             | 45                           |
| 7             | 5                                    | 4                               | 45                             | 53                           |
| 8             | 5                                    | 6                               | 40                             | 28                           |
| 9             | 6.5                                  | 1                               | 40                             | 47                           |
| 10            | 6.5                                  | 2                               | 45                             | 44                           |
| 11            | 6.5                                  | 4                               | 30                             | 29                           |
| 12            | 6.5                                  | 6                               | 35                             | 55                           |
| 13            | 8                                    | 1                               | 45                             | 71                           |
| 14            | 8                                    | 2                               | 40                             | 65                           |
| 15            | 8                                    | 4                               | 35                             | 46                           |
| 16            | 8                                    | 6                               | 30                             | 31                           |
| T1            | 153                                  | 194                             | 130                            | T=718                        |
| T2            | 177                                  | 184                             | 182                            |                              |
| T3            | 175                                  | 185                             | 197                            |                              |
| T4            | 213                                  | 155                             | 209                            |                              |
| t1            | 38.25                                | 48.50                           | 32.50                          |                              |
| t2            | 44.25                                | 46.00                           | 45.50                          |                              |
| t3            | 43.75                                | 46.25                           | 49.25                          |                              |
| t4            | 53.25                                | 38.75                           | 52.25                          |                              |
| R             | 15.00                                | 9.75                            | 19.75                          |                              |

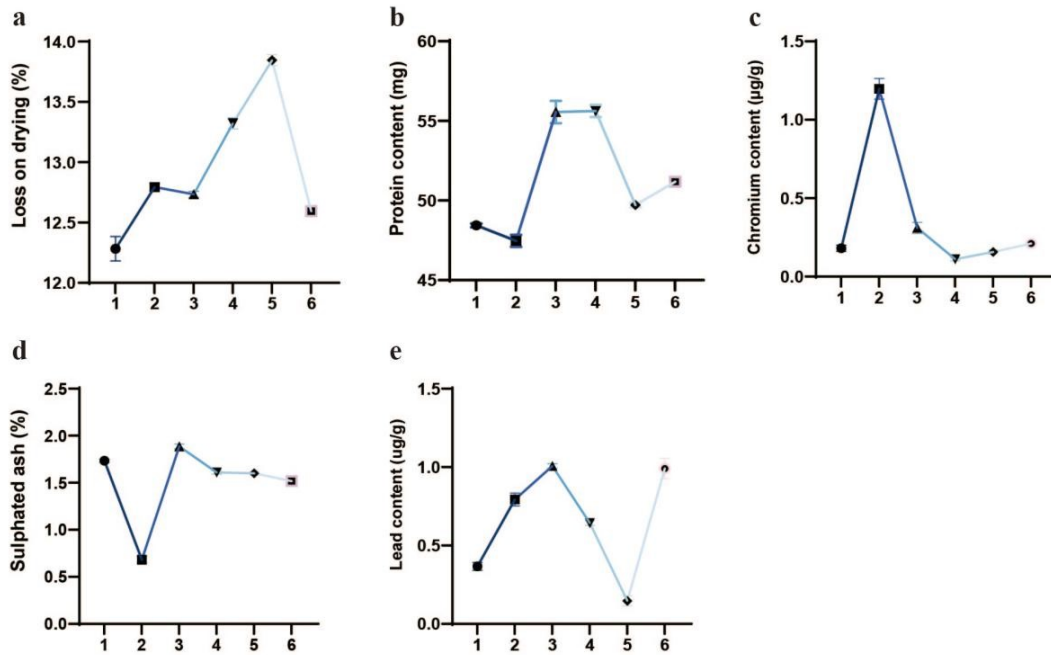

**Supplementary Figure 2.** Preparation and characterization of PMVs-AGS. (a) The drying weight loss rate of absorbable gelatin sponge samples 1-6; (b) Determination of protein content in absorbable gelatin sponge samples 1-6; (c) Determination of chromium content in absorbable gelatin sponge samples 1-6; (d) Determination of sulphated ash content in absorbable gelatin sponge samples 1-6; (e) Determination of lead content in absorbable gelatin sponge samples 1-6.

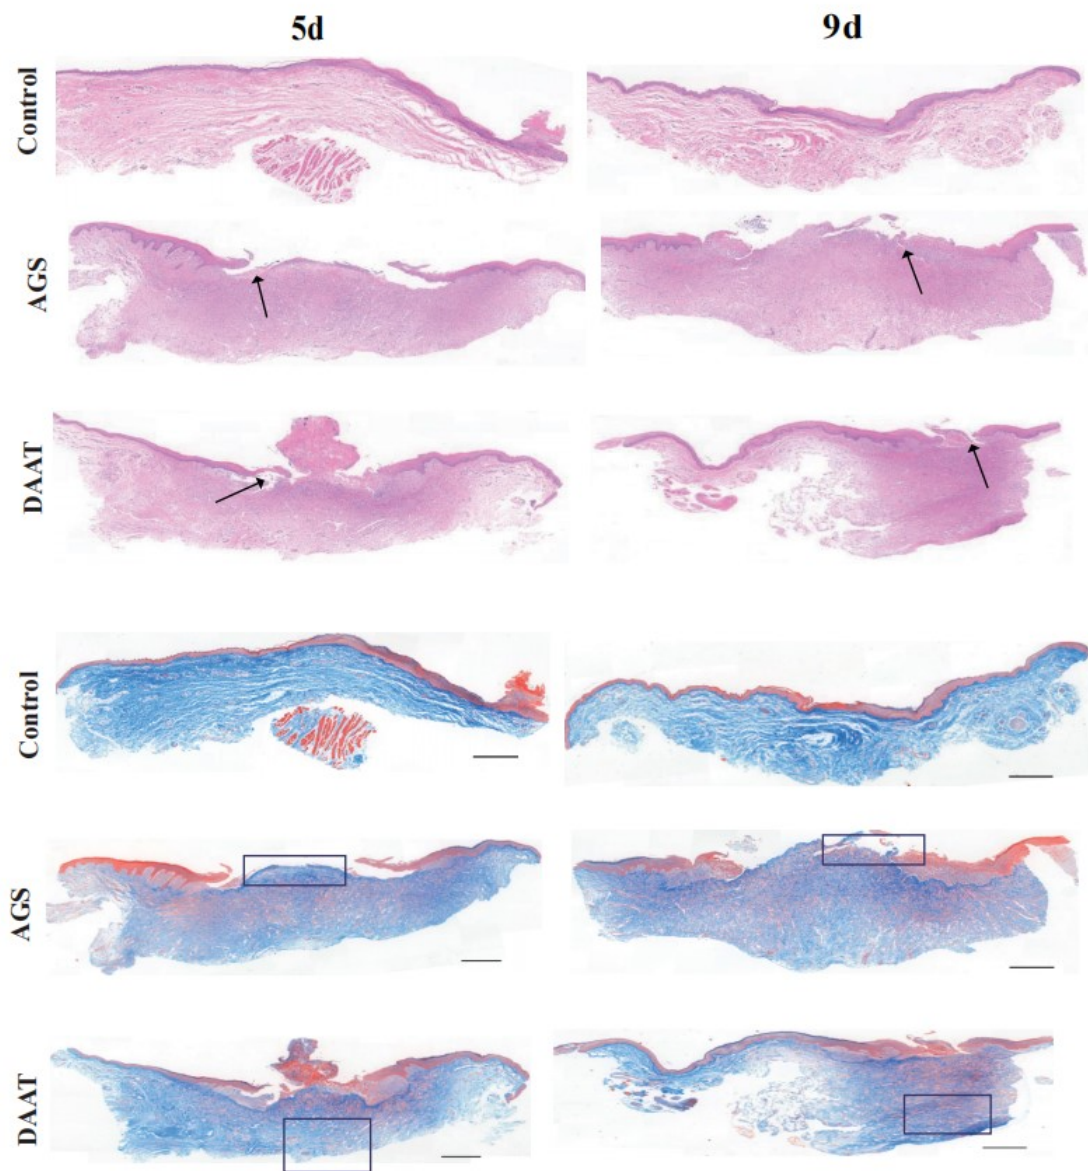

**Supplementary Figure 3.** HE and Masson staining revealed enhanced epithelialization and collagen deposition in the control, AGS, and DAAT groups.
